# Supplementary material for: Evaluation of Ultrafast Wave-CAIPI 3D FLAIR in the Visualization and Volumetric Estimation of Cerebral White Matter Lesions
Source: bioRxiv or medRxiv preprint supplement (doi:10.1101/2021.01.10.21249348), 2021-01-11
Supplement: Supplementary file [file media-1.pdf]

**Supplementary Table 1:** Qualitive scoring criteria used for head-to-head comparison between Standard and Wave-FLAIR

| Parameter                                                                            | Favors image A*                                                                                                              |                                                                                                                                      | 0          | Favors image B*                                                                                                                         |                                                                                                                                 |
|--------------------------------------------------------------------------------------|------------------------------------------------------------------------------------------------------------------------------|--------------------------------------------------------------------------------------------------------------------------------------|------------|-----------------------------------------------------------------------------------------------------------------------------------------|---------------------------------------------------------------------------------------------------------------------------------|
|                                                                                      | -1                                                                                                                           | -2                                                                                                                                   |            | +1                                                                                                                                      | +2                                                                                                                              |
| <b>Conspicuity/visualization of lesions</b>                                          | Lesions are less well visualized/conspicuous on image B and some lesions are missed                                          | Lesions are less well visualized/conspicuous on image B but all lesions are still visualized                                         | Equivalent | Lesions are less well visualized/conspicuous on image A but all lesions are still visualized                                            | Lesions are less well visualized/conspicuous on image A and some lesions are missed                                             |
| <b>Motion:</b><br>perceptible motion artifact when the images are optimally windowed | The B image has more motion artifacts that obscure small lesions.                                                            | The B image has more motion artifacts but it does not obscure small lesions.                                                         | Equivalent | The A image has more motion artifacts but it does not obscure small lesions.                                                            | The A image has more motion artifacts that obscures small lesions.                                                              |
| <b>Pulsation artifact</b>                                                            | Image B has more artifact and the artifact obscures underlying lesion(s).                                                    | Image B has more artifact but no lesions are obscured.                                                                               | Equivalent | Image A has more artifact but no lesions are obscured.                                                                                  | Image A has more artifact and the artifact obscures underlying lesion(s).                                                       |
| <b>Noise:</b><br>perceptible noise level when the images are optimally windowed      | Background noise of the B image perceptibly greater than the A image and affects the visualization of underlying structures. | Background noise of the B image perceptibly greater than the A image and does not affect the visualization of underlying structures. | Equivalent | Background noise of the A image is perceptibly greater than the B image and does not affect the visualization of underlying structures. | Background noise of the A image is perceptibly greater than the B image and affects the visualization of underlying structures. |
| <b>Overall diagnostic quality</b>                                                    | The B image has poorer image quality and the difference in quality affects the final clinical diagnosis.                     | The B image has poorer image quality but it does not affect the final clinical diagnosis.                                            | Equivalent | The A image has poorer image quality but it does not affect the final clinical diagnosis.                                               | The A image has poorer image quality and the difference in quality affects the final clinical diagnosis.                        |

\*The Standard and Wave-FLAIR sequences were randomly positioned on either the right or left side of the screen, labeled image A and image B.

**Supplementary Table 2.** Clinical characteristics of the patients

| Characteristics                       | Whole cohort (n=42) | Included in Quantitative Analysis (N=36)* |
|---------------------------------------|---------------------|-------------------------------------------|
| <b>Female (%)</b>                     | 33 (78.6%)          | 28 (77.8%)                                |
| <b>Age (year) (mean and range)</b>    | 44.5 (23-78)        | 44.8 (23-78)                              |
| <b>20-ch Coil (%)</b>                 | 36 (85.7%)          | 30 (83.3%)                                |
| <b>Study indication</b>               |                     |                                           |
| <b>Rule out</b> demyelinating disease | 18 (42.9%)          | 14 (38.9%)                                |
| Follow up of demyelinating disease    | 23 (54.8%)          | 21 (58.3%)                                |
| Other                                 | 1 (2.4%)            | 1 (2.8%)                                  |
| <b>Order of the sequences</b>         |                     |                                           |
| <b>Standard before Wave-FLAIR (%)</b> | 22 (52.4%)          | 17 (47.2%)                                |

\*Six patients were excluded from the LST quantitative analysis due to absence of detectable lesions and/or severe motion artifact resulting in failure of the automated LST processing stream.

**Supplementary Table 3:** Comparison of number of lesions in brain regions between Standard and Wave-FLAIR

| Brain regions                   | Standard                         |                  | WAVE                             |                  | Student's t-test |
|---------------------------------|----------------------------------|------------------|----------------------------------|------------------|------------------|
|                                 | Lesions in all patients (number) | Mean ( $\pm$ SD) | Lesions in all patients (number) | Mean ( $\pm$ SD) | p-value          |
| <b>Whole brain</b>              | 520                              | 14.4 (9.8)       | 529                              | 14.7 (9.7)       | 0.91             |
| <b>Periventricular</b>          | 223                              | 6.19 (4.25)      | 228                              | 6.33 (4.33)      | 0.89             |
| <b>Juxtacortical</b>            | 79                               | 2.19 (1.89)      | 79                               | 2.19 (1.89)      | 0.99             |
| <b>Infra-tentorial</b>          | 35                               | 0.97 (1.4)       | 35                               | 0.97 (1.4)       | 0.99             |
| <b>Deep white matter</b>        | 99                               | 2.75 (2.9)       | 100                              | 2.78 (2.9)       | 0.97             |
| <b>Subcortical white matter</b> | 71                               | 1.97 (2.47)      | 72                               | 2 (2.54)         | 0.96             |
| <b>Deep gray matter</b>         | 24                               | 0.67 (1.29)      | 24                               | 0.67 (1.29)      | 0.99             |

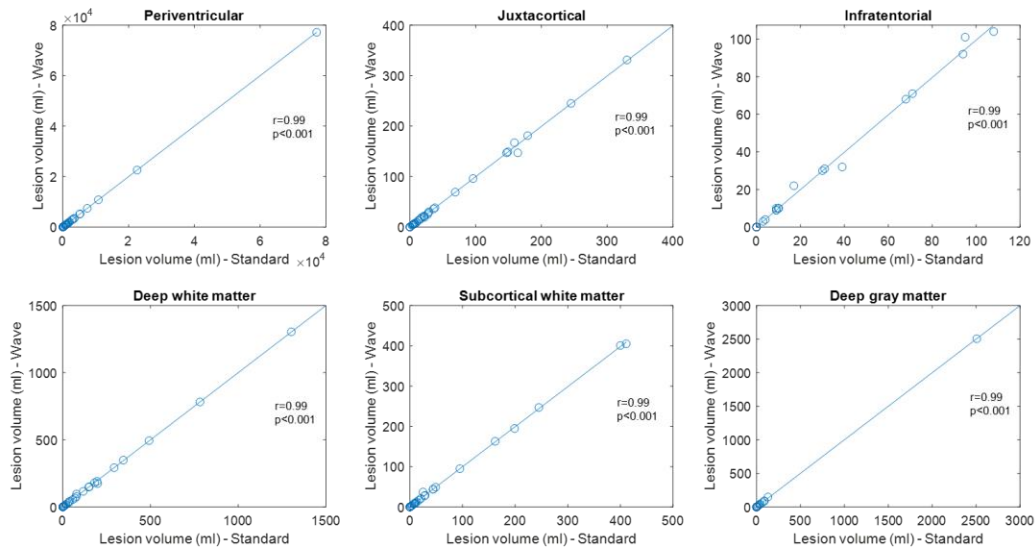

**Supplementary Figure 1.** Scatter plots of lesion volume of Standard versus Wave-FLAIR in each brain region. ( $r$ =Pearson's correlation coefficient,  $p$ = $p$  value)

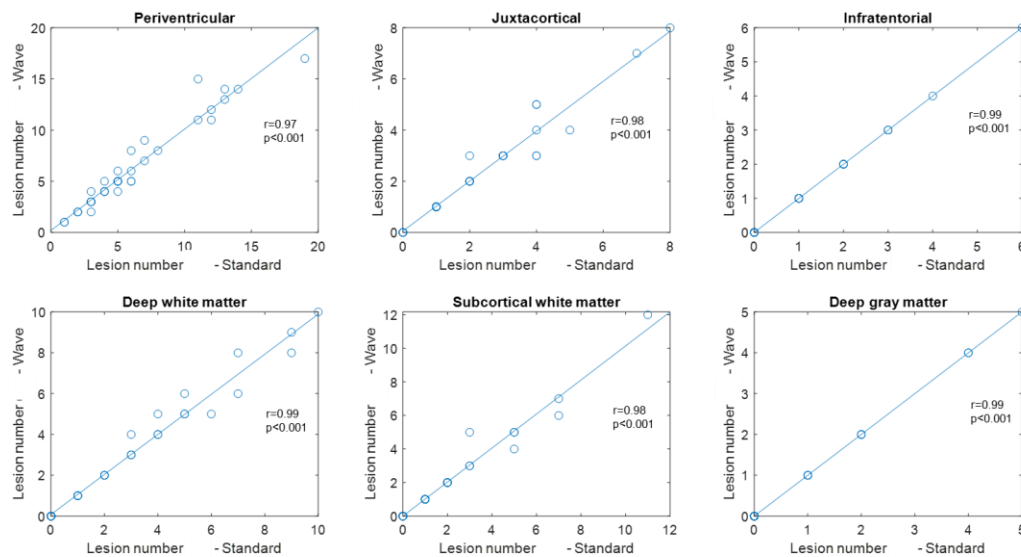

**Supplementary Figure 2.** Scatter plots of lesion number of Standard versus Wave-FLAIR in each brain region. ( $r$ =Pearson's correlation coefficient,  $p$ = $p$  value)
